# Supplementary material for: High potential of new dyeing photoinitiators for fast curing of (meth)acrylate compositions under low intensity UV–Vis light
Source: Royal Society of Chemistry journal article supplement (doi:10.1039/d3py00764b), 2023-01-01

Electronic Supplementary Material (ESI) for Polymer Chemistry.  
This journal is © The Royal Society of Chemistry 2023

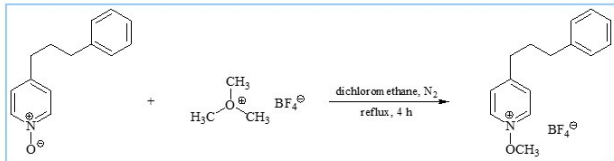

Supplement: d3py00764b9.pdf [file d3py00764b9.pdf]
