# Supplementary material for: High potential of new dyeing photoinitiators for fast curing of (meth)acrylate compositions under low intensity UV–Vis light
Source: Royal Society of Chemistry journal article supplement (doi:10.1039/d3py00764b), 2023-01-01
Supplement: d3py00764b10.pdf [file d3py00764b10.pdf]

## Supporting Information

### **High potential of new dyeing photoinitiators for fast curing of (meth)acrylate compositions upon UV-Vis low light intensity**

Alicja Balcerak-Woźniak,<sup>a</sup> Janina Kabatc-Borc<sup>\*a</sup>, Paulina Bednarczyk,<sup>b</sup> and Zbigniew Czech<sup>b</sup>

<sup>a</sup> Bydgoszcz University of Science and Technology, Faculty of Chemical Technology and Engineering, Department of Organic Chemistry, Seminaryjna 3, 85-326 Bydgoszcz, Poland

<sup>b</sup> West Pomeranian University of Technology in Szczecin, Faculty of Chemical Technology and Engineering, Department of Chemical Organic Technology and Polymeric Materials, International Laboratory of Adhesives and Self-Adhesive Materials, Pułaskiego 10, 70-322 Szczecin, Poland

<sup>\*</sup> Corresponding author: [nina@pbs.edu.pl](mailto:nina@pbs.edu.pl) (J. K-B.)

## 1. Synthesis procedure

### Sensitizers

Two different 1,3-bis(arylamino)squaraines used as sensitizers in photoinitiating systems under study were synthesized by the Knoevenagel condensation of two molar equivalents of 3,4-dihydroxycyclobut-3-ene-1,2-dione (squaric acid). The general procedure for the preparation of target compounds, such as: 1,3-bis(6-chlorobenzothiazolamino)squaraine (SQN1) and 1,3-bis(2-methylbenzothiazolamino)squaraine (SQN2) is presented in Scheme S1.

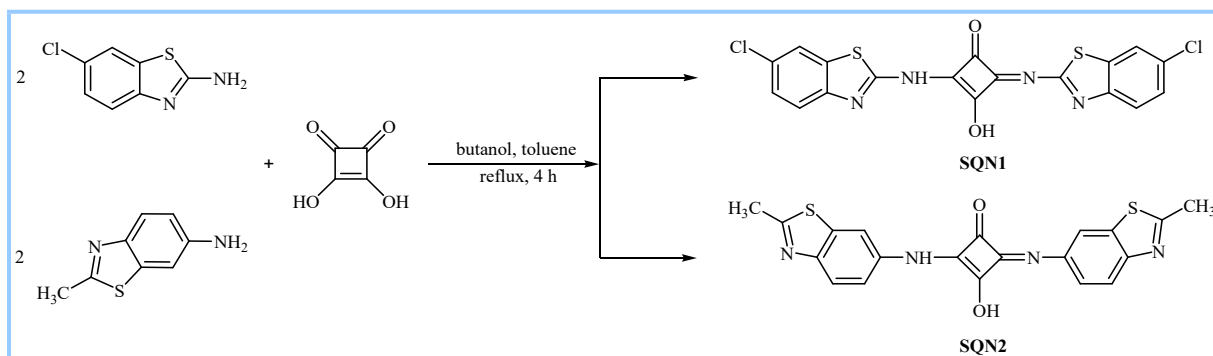

**Scheme S1** Preparation of squaraine derivatives.

#### *1,3-bis(6-chlorobenzothiazolamino)squaraine (SQN1)*

3,4-Dihydroxycyclobut-3-ene-1,2-dione (0.29 g; 2.5 mmol) was heated under reflux in a mixture of anhydrous solvents, i.e.: 1-butanol (40 ml) and toluene (20 ml). The water formed during reaction was distilled azeotropically using a Dean-Stark trap. After 1 h, 2-amine-6-chlorobenzothiazole (0.92 g; 5.0 mmol) was added and the reaction mixture was refluxed for additional 4 h. In the next step, the reaction mixture was cooled and the solvent removed under vacuum. The obtained solid was dried at ambient temperature.

#### *1,3-bis(2-methylbenzothiazolamino)squaraine (SQN2)*

3,4-Dihydroxycyclobut-3-ene-1,2-dione (0.29 g; 2.5 mmol) was heated under reflux in a mixture of anhydrous solvents, i.e.: 1-butanol (40 ml) and toluene (20 ml). The water formed during the reaction was distilled azeotropically using a Dean-Stark trap. After 1 h, 6-amine-2-methylbenzothiazole (0.82 g; 5.0 mmol) was added and the reaction mixture was refluxed for additional 4 h. In the next step, the reaction mixture was cooled and the solvent removed under vacuum. The obtained solid was dried at ambient temperature.

### Co-initiator

Novel *N*-alkoxy pyridinium salt was prepared by *O*-alkylation of pyridine *N*-oxide with trimethyloxonium tetrafluoroborate. The general route of synthesis of *N*-methoxy-4-(3-phenylpropyl)pyridinium tetrafluoroborate (NO1) is shown in Scheme S2.

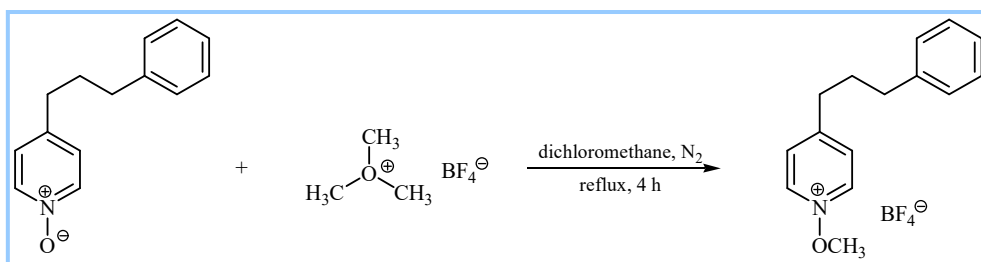

**Scheme S2.** Preparation of *N*-alkoxypyridinium salt (NO1).

*N*-methoxy-4-(3-phenylpropyl)pyridinium tetrafluoroborate (NO1)

A mixture of 4-(3-phenylpropyl)pyridine *N*-oxide (1.35 g; 6.3 mmol) and trimethyloxonium tetrafluoroborate (1.07 g; 7.2 mmol) in 30 ml of dry dichloromethane was refluxed 4h under nitrogen. Then, the solvent was evaporated under vacuum to obtain a crude product.

## 2. Physicochemical data

**Table S1** Physicochemical data of synthesized compounds.

| Compound                                                                                                                                                | Abbreviation | Physicochemical data                                                                                                                                                                                                                                                                                                                                                                                                                                                                 |
|---------------------------------------------------------------------------------------------------------------------------------------------------------|--------------|--------------------------------------------------------------------------------------------------------------------------------------------------------------------------------------------------------------------------------------------------------------------------------------------------------------------------------------------------------------------------------------------------------------------------------------------------------------------------------------|
| 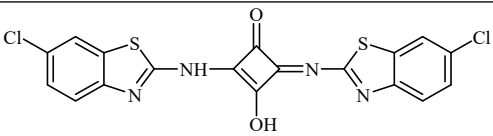<br>1,3- <i>bis</i> (6-chlorobenzothiazolamino)squaraine             | SQN1         | <b><sup>1</sup>H NMR:</b> 4.19 (s, 1H, -NH), 7.28-7.30 (dd, 1H, Ar), 7.33-7.36 (d, 1H, Ar), 7.43-7.45 (dd, 1H, Ar), 7.70-7.73 (d, 1H, Ar), 7.83-7.84 (s, 1H, Ar), 8.07-8.08 (s, 1H, Ar), 8.15-8.16 (s, 1H, -OH)<br><b><sup>13</sup>C NMR:</b> 118.28, 120.76, 121.55, 122.32, 125.88, 126.54, 127.38, 128.14, 131.39, 133.22, 147.52, 148.78, 162.74, 168.20, 171.59, 186.92, 196.09<br><b>Yield:</b> 82.7%<br><b>M.p.</b> > 305°C (decomposition)                                   |
| 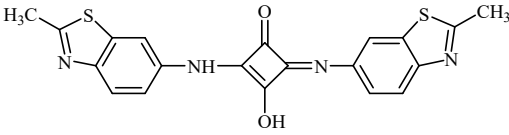<br>1,3- <i>bis</i> (2-methylbenzothiazolamino)squaraine             | SQN2         | <b><sup>1</sup>H NMR:</b> 2.80 (s, 6H, -CH <sub>3</sub> ), 5.77 (s, 1H, -NH), 7.92-8.43 (s, 6H, Ar), 11.70 (s, 1H, -OH)<br><b>Yield:</b> 85.1%<br><b>M.p.</b> > 390°C (decomposition)                                                                                                                                                                                                                                                                                                |
| 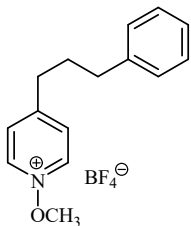<br><i>N</i> -methoxy-4-(3-phenylpropyl)pyridinium tetrafluoroborate | NO1          | <b><sup>1</sup>H NMR:</b> 1.89-2.04 (tt, 2H, CH <sub>2</sub> ), 2.60-2.66 (tt, 2H, CH <sub>2</sub> ), 2.86-2.96 (tt, 2H, CH <sub>2</sub> ), 4.40 (s, 3H, CH <sub>3</sub> ), 7.17-7.31 (m, 5H, Ar), 7.89-7.91 (d, 1H, Ar, <i>J</i> ≈ 6.92 Hz), 8.11-8.13 (d, 1H, Ar, <i>J</i> ≈ 6.96 Hz), 8.80-9.34 (dd, 2H, Ar)<br><b><sup>13</sup>C NMR:</b> 31.16, 31.50, 34.01, 34.43, 34.79, 34.90, 69.85, 126.42, 128.08, 128.80, 129.18, 140.46, 141.69, 141.93, 162.44<br><b>Yield:</b> 62.5% |

### 3. $^1\text{H}$ NMR and $^{13}\text{C}$ NMR spectra

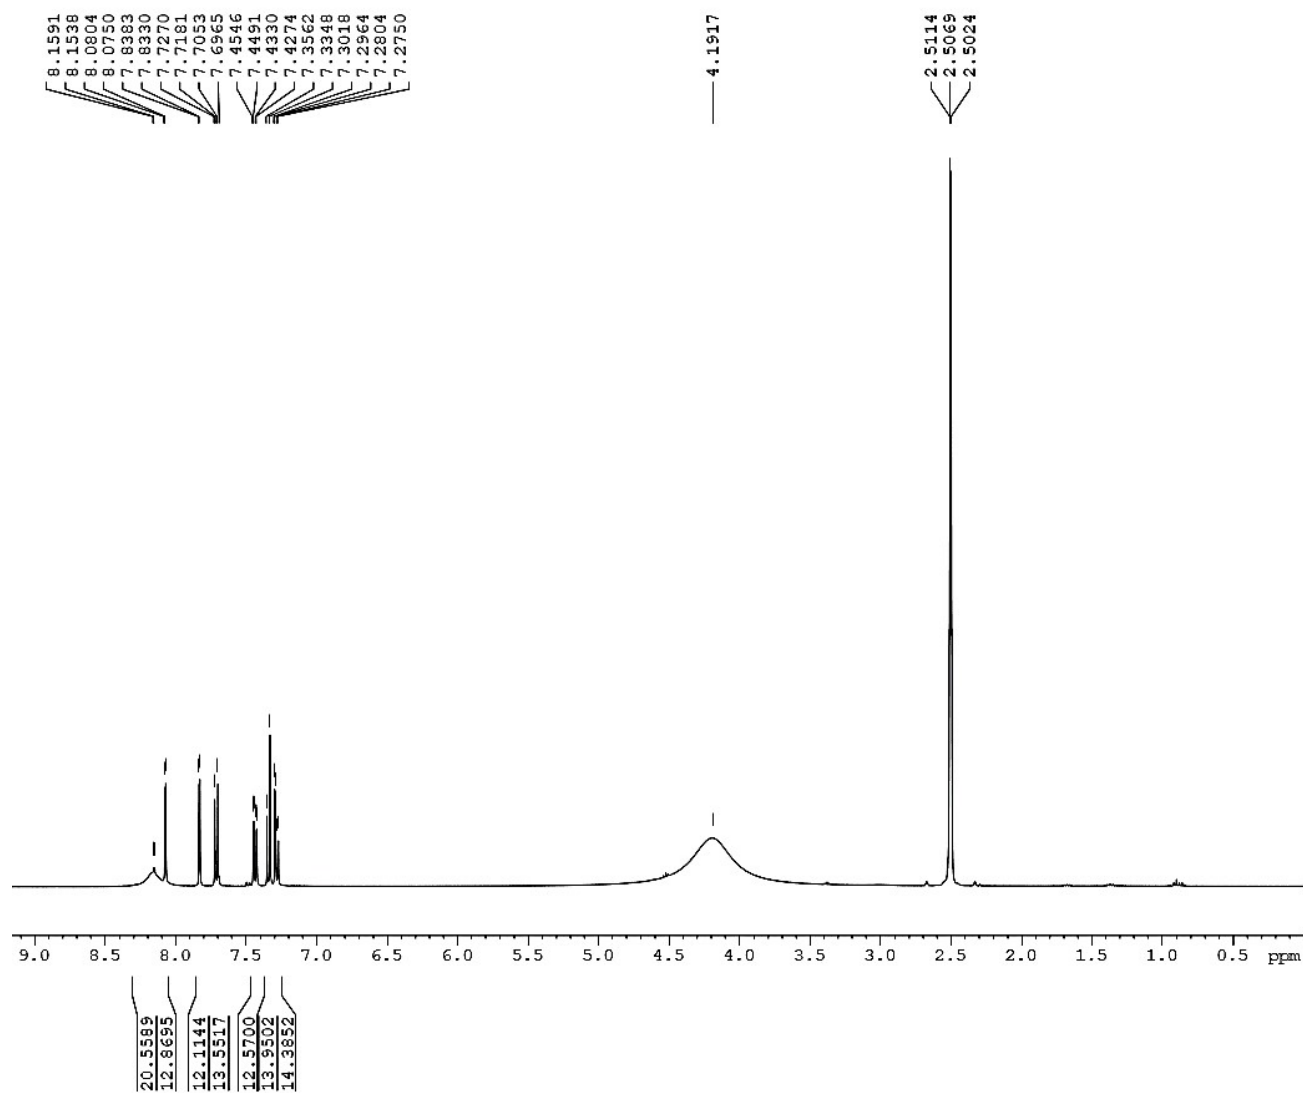

**Fig. S1**  $^1\text{H}$  NMR spectrum of 1,3-bis(6-chlorobenzothiazolamino)squaraine, SQN1.

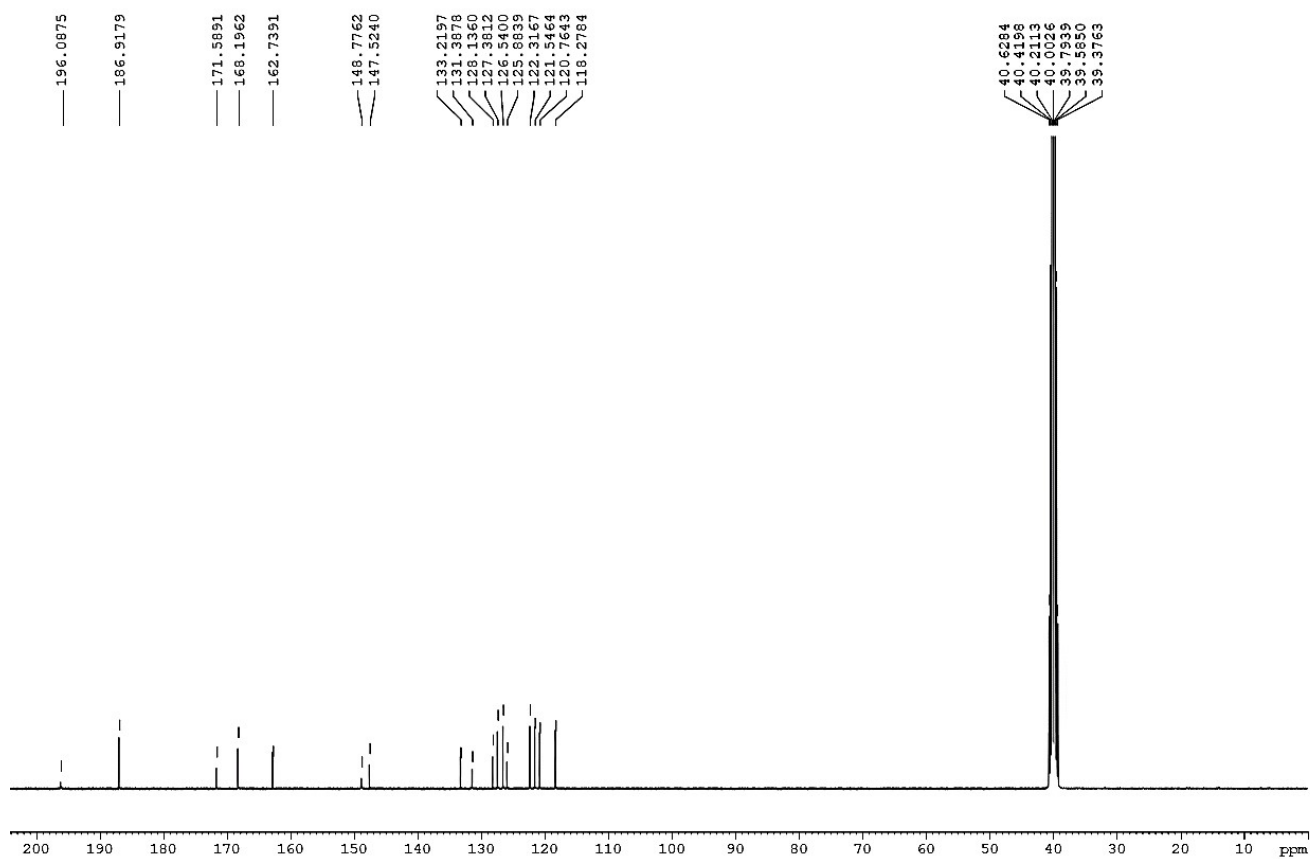

**Fig. S2**  $^{13}\text{C}$  NMR spectrum of 1,3-*bis*(6-chlorobenzothiazolamino)squaraine, SQN1.

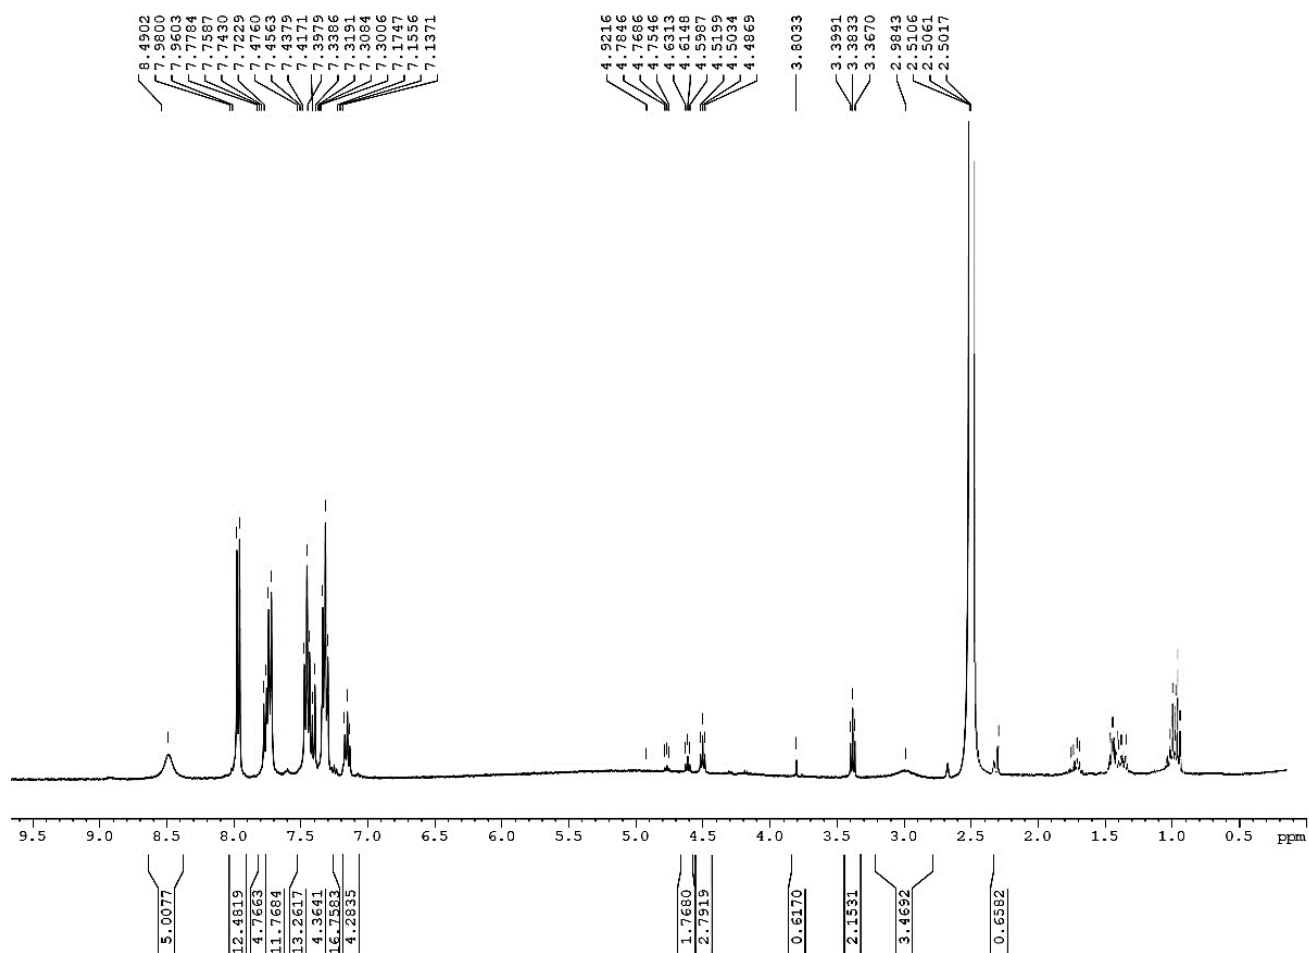

**Fig. S3**  $^1\text{H}$  NMR spectrum of 1,3-*bis*(2-methylbenzothiazolamino)squaraine, SQN2.

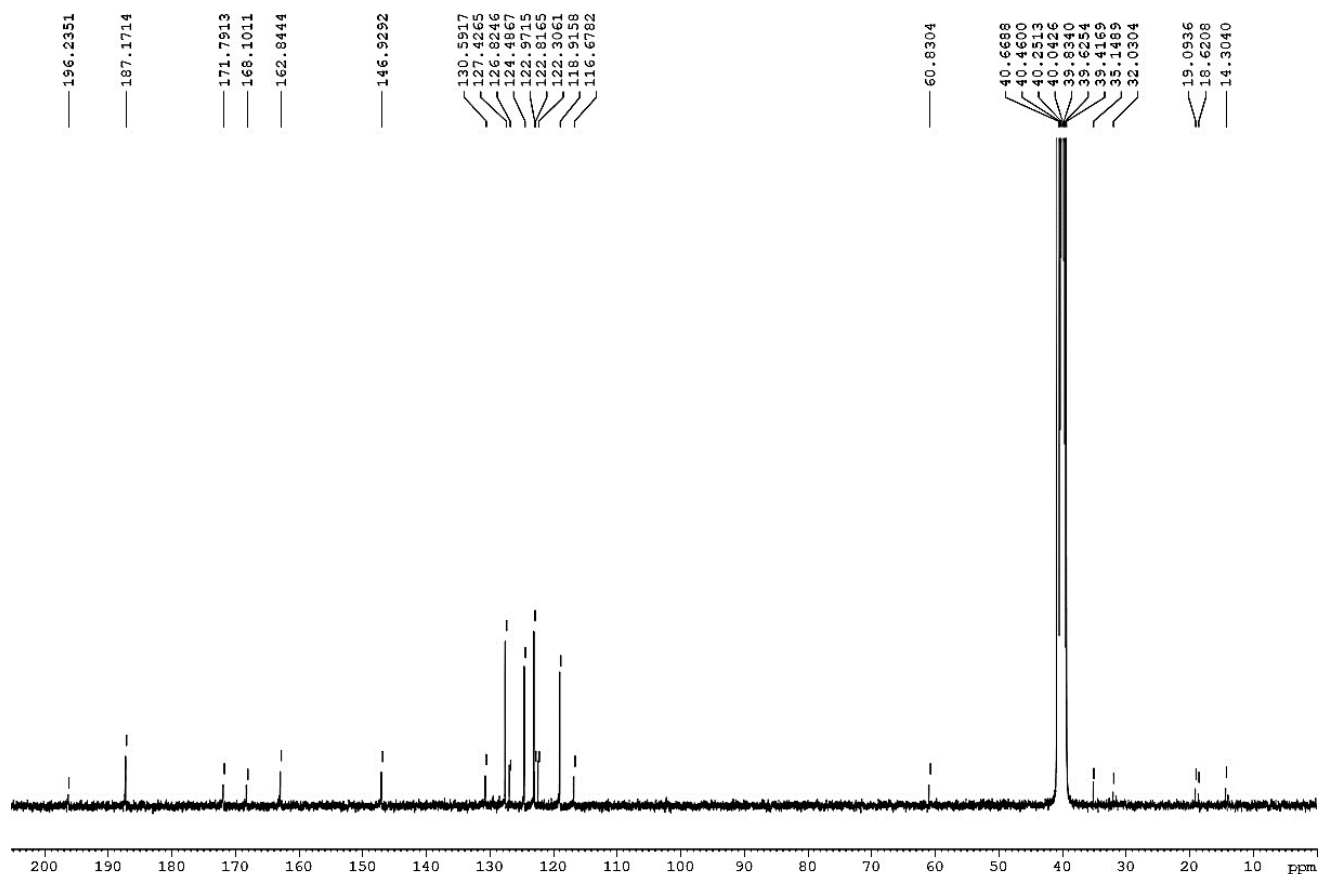

**Fig. S4**  $^{13}\text{C}$  NMR spectrum of 1,3-*bis*(2-methylbenzothiazolamino)squaraine, SQN2.

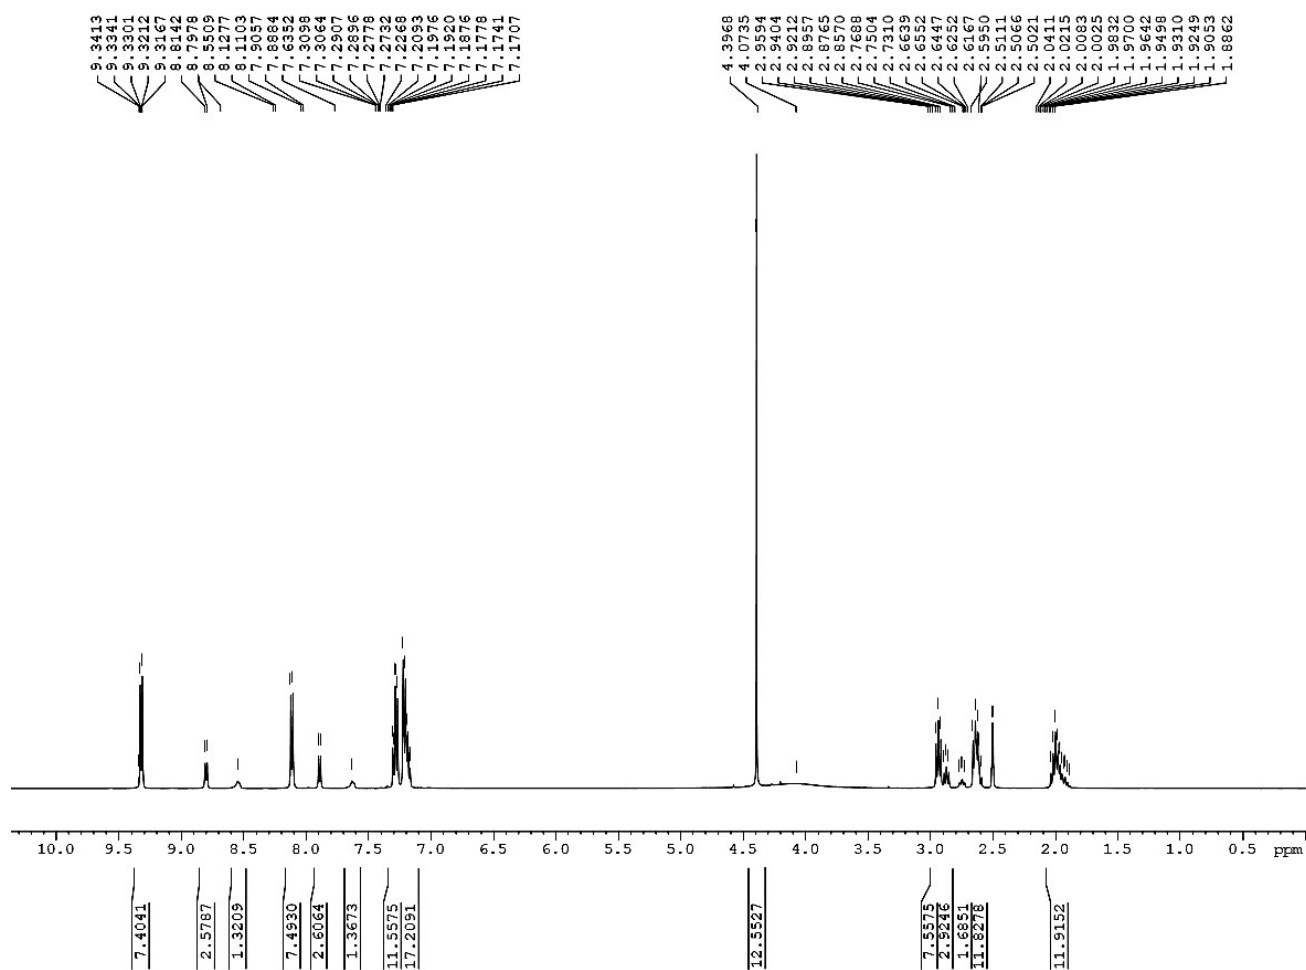

**Fig. S5**  $^1\text{H}$  NMR spectrum of *N*-methoxy-4-(3-phenylpropyl)pyridinium tetrafluoroborate, NO1.

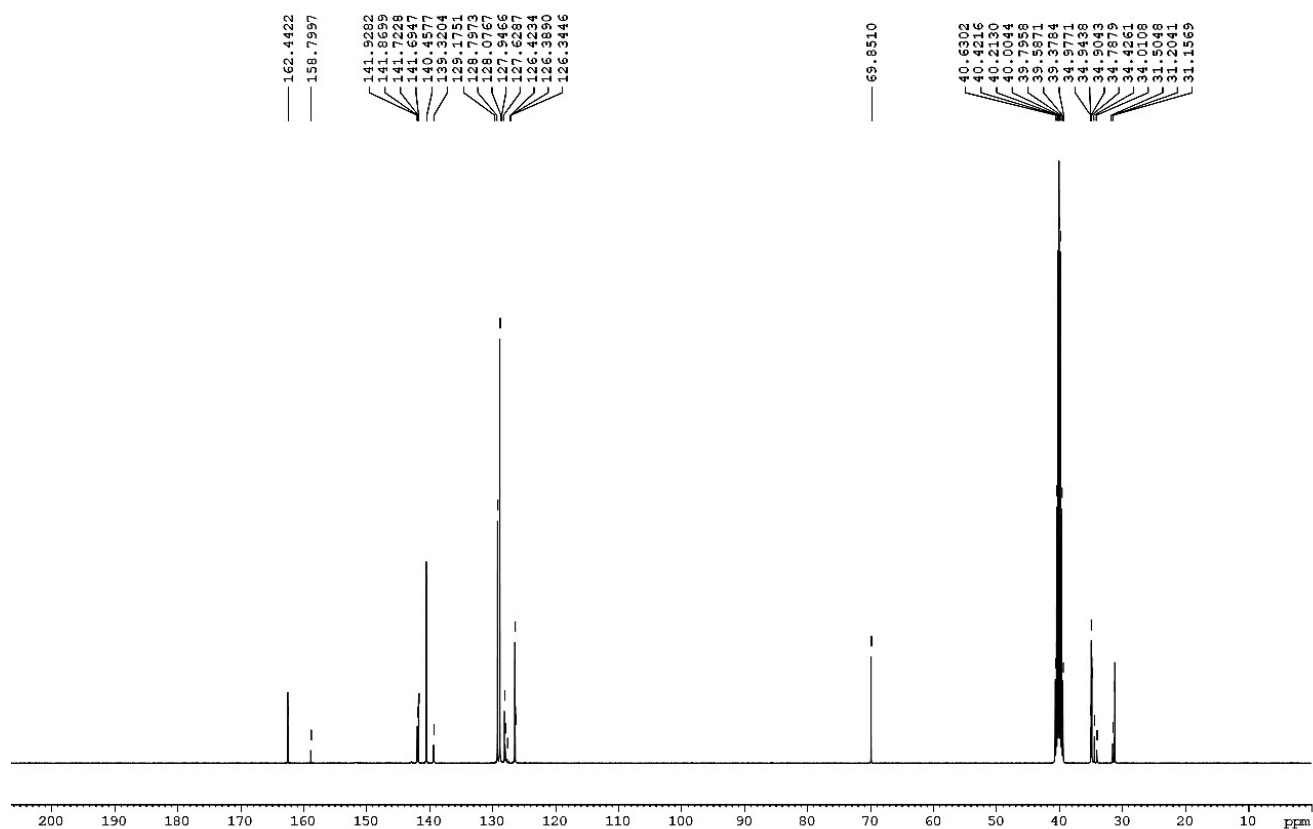

**Fig. S6**  $^{13}\text{C}$  NMR spectrum of *N*-methoxy-4-(3-phenylpropyl)pyridinium tetrafluoroborate, NO1.

#### 4. Steady state photolysis

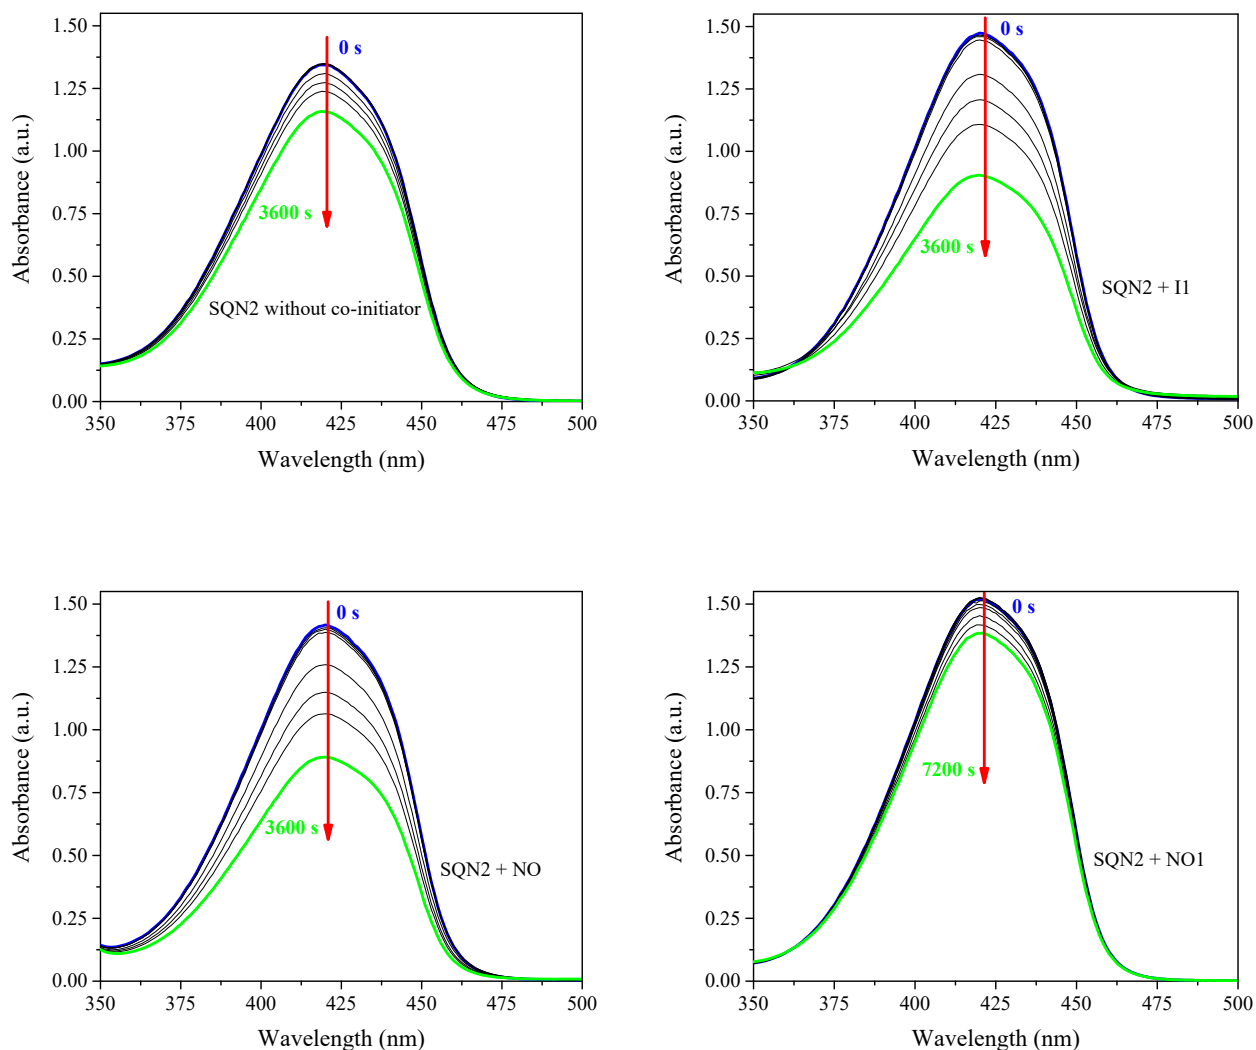

**Fig. S7** The steady-state photolysis curves of SQN2 (alone and combined with onium salts) in *N,N*-dimethylformamide under irradiation at 518 nm; light intensity: 30 mW cm<sup>-2</sup>, concentration of co-initiator:  $1 \times 10^{-3}$  M. The type of co-initiator was marked on the figure.

## 5. Cyclic voltammetry

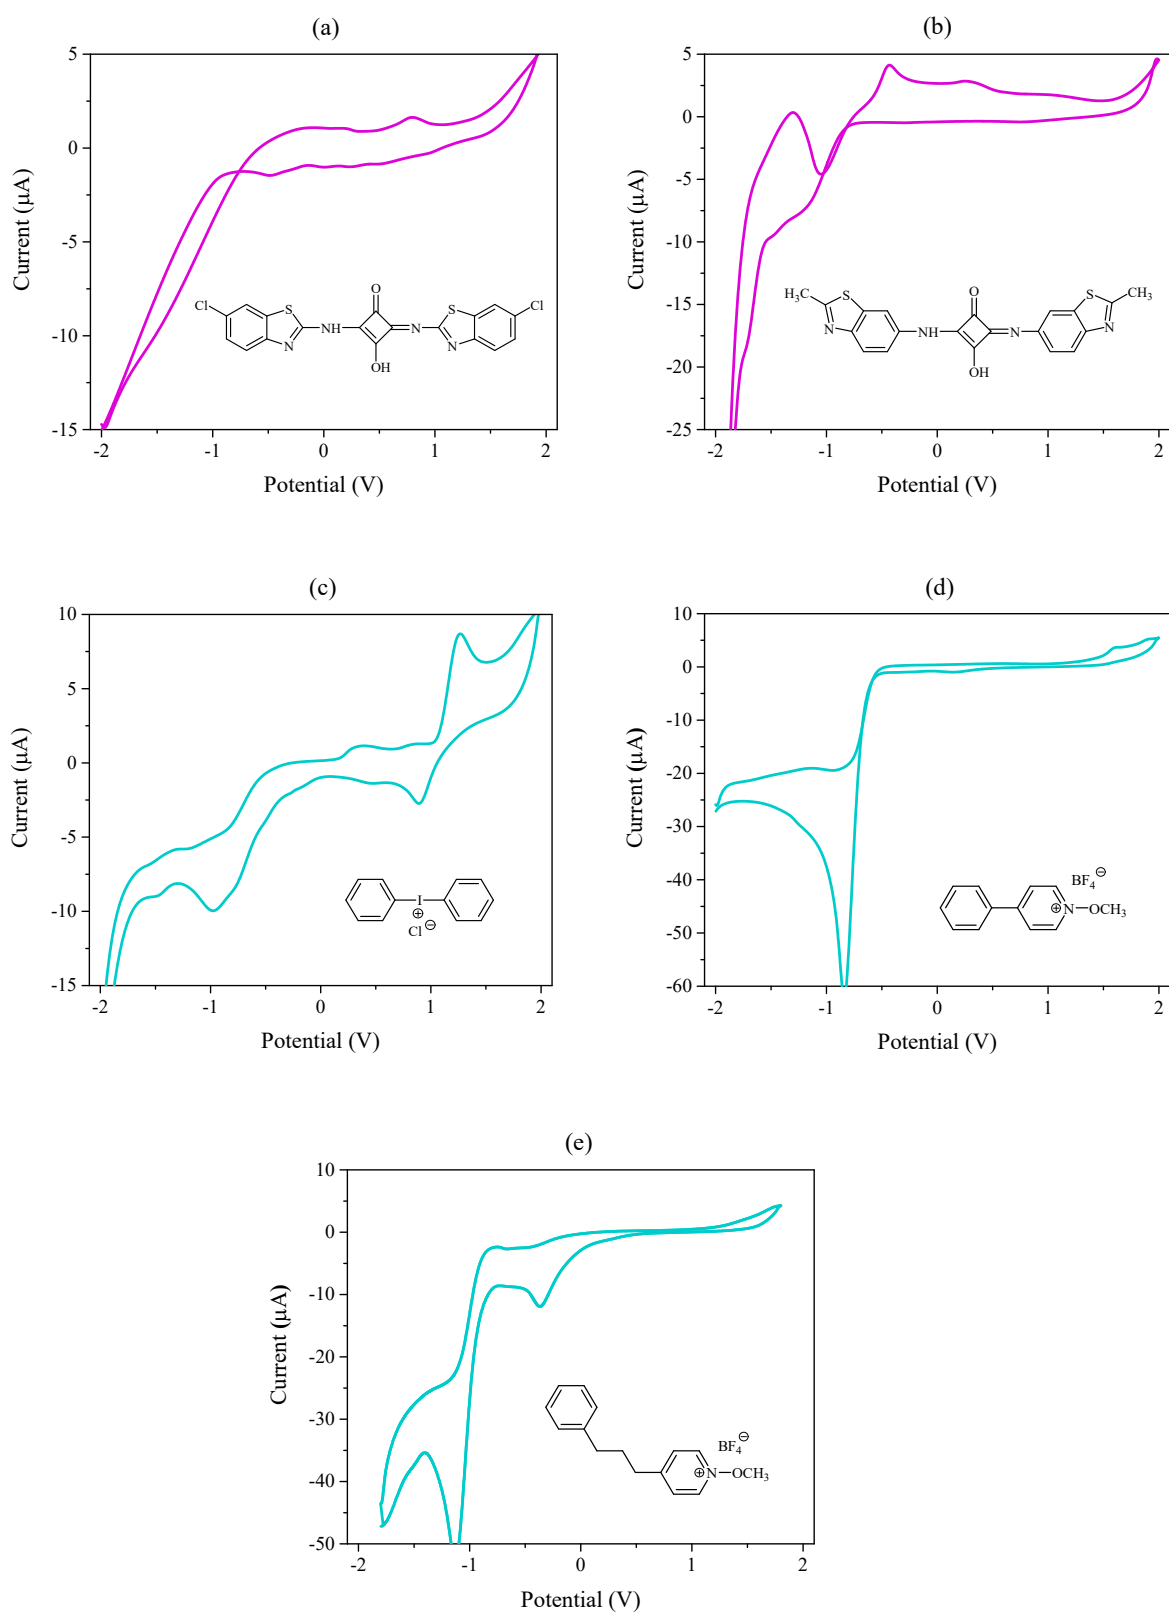

**Fig. S8** Cyclic voltammograms of squaraines: (a) SQN1, (b) SQN2, and onium salts: (c) I1, (d) NO, (e) NO1, registered in 0.1 M tetrabutylammonium perchlorate in dry acetonitrile as the supporting electrolyte.
