# Supplementary figures and images for: High potential of new dyeing photoinitiators for fast curing of (meth)acrylate compositions under low intensity UV–Vis light
Source: Royal Society of Chemistry journal article supplement (doi:10.1039/d3py00764b), 2023-01-01

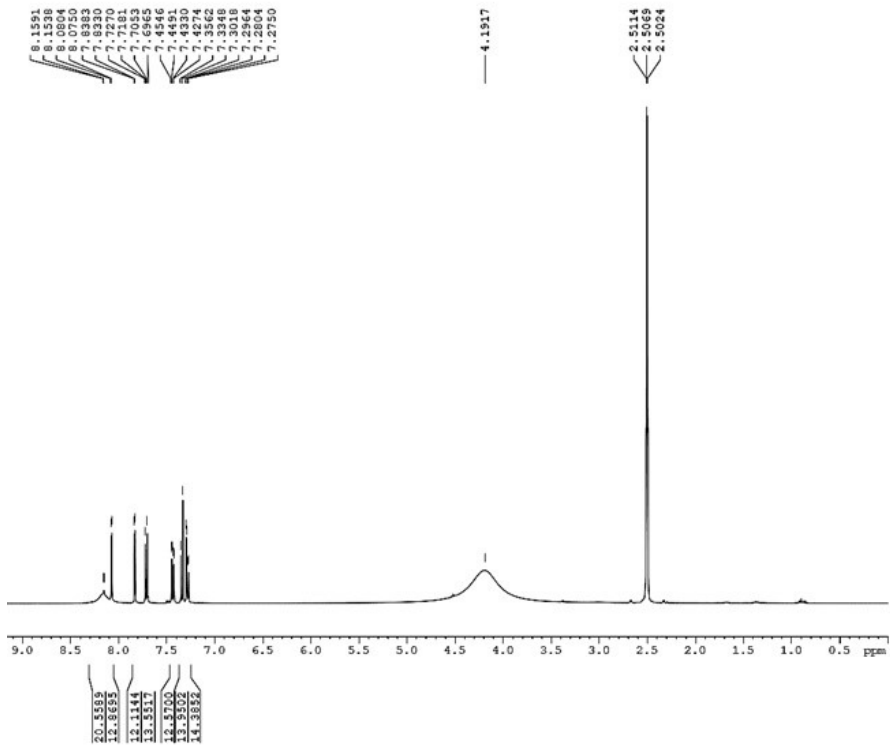

Supplement: d3py00764b2.pdf [file d3py00764b2.pdf]

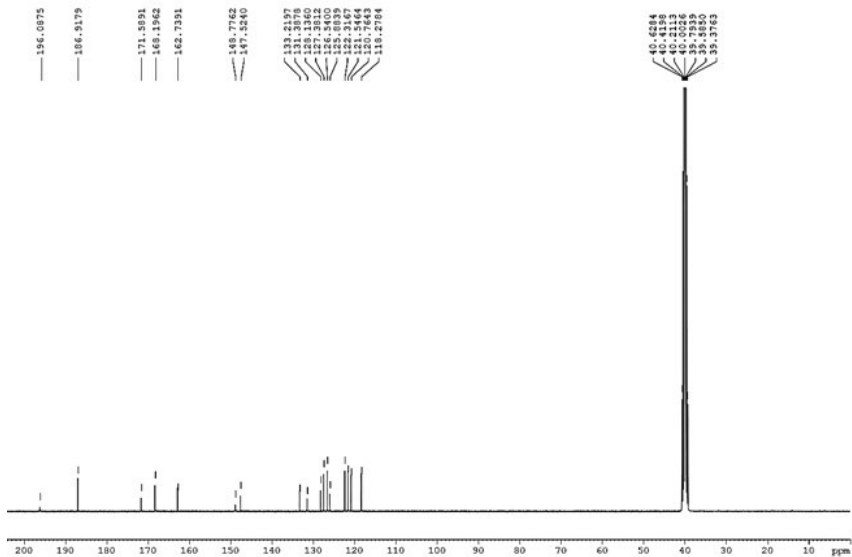

Supplement: d3py00764b3.pdf [file d3py00764b3.pdf]

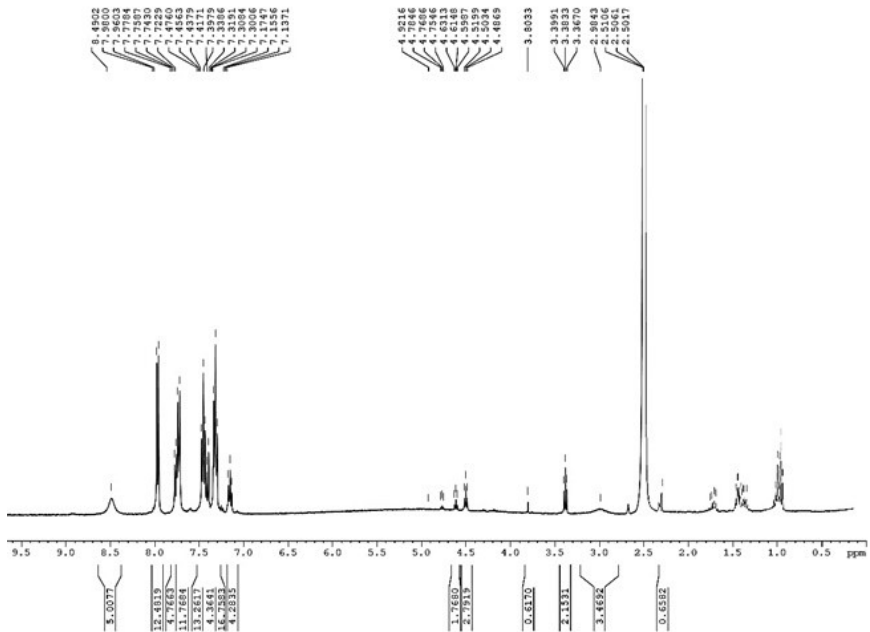

Supplement: d3py00764b4.pdf [file d3py00764b4.pdf]

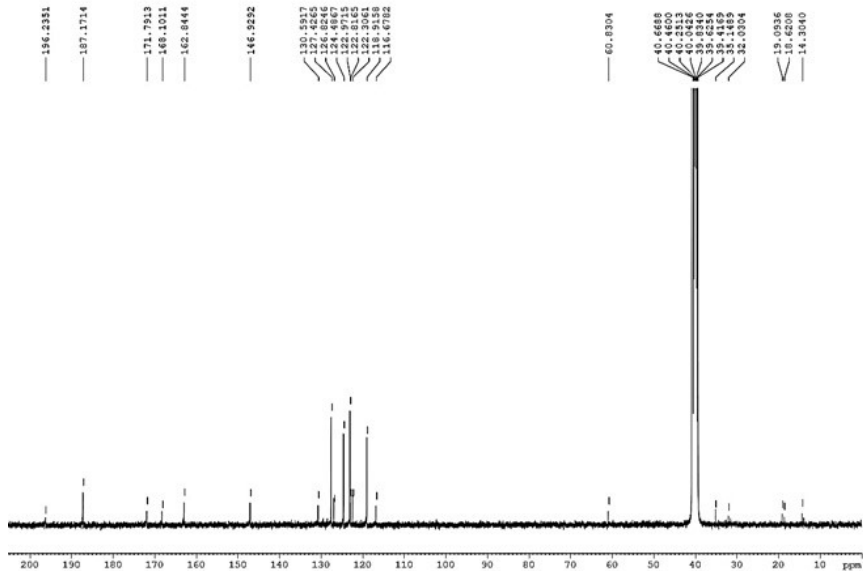

Supplement: d3py00764b5.pdf [file d3py00764b5.pdf]

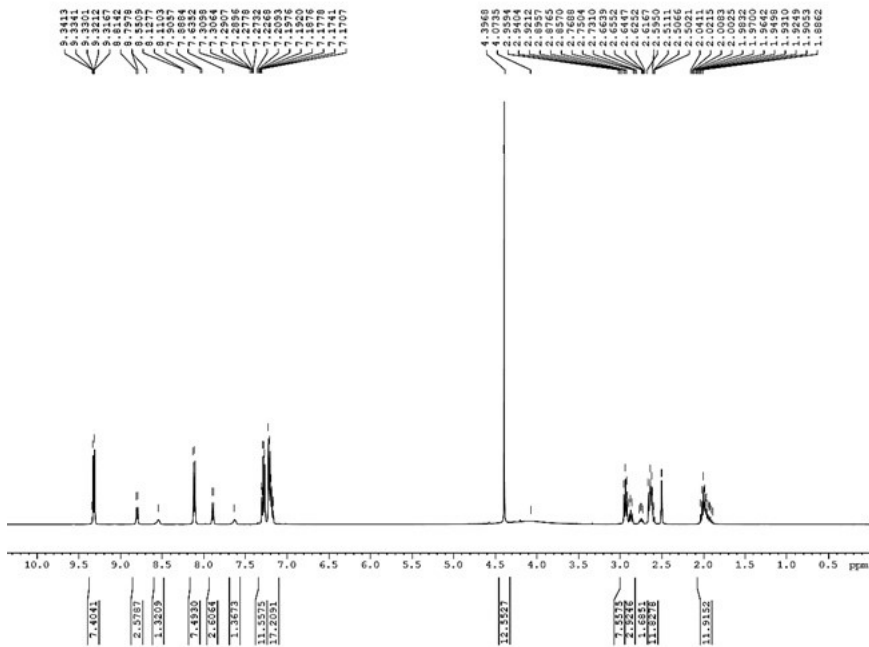

Supplement: d3py00764b6.pdf [file d3py00764b6.pdf]

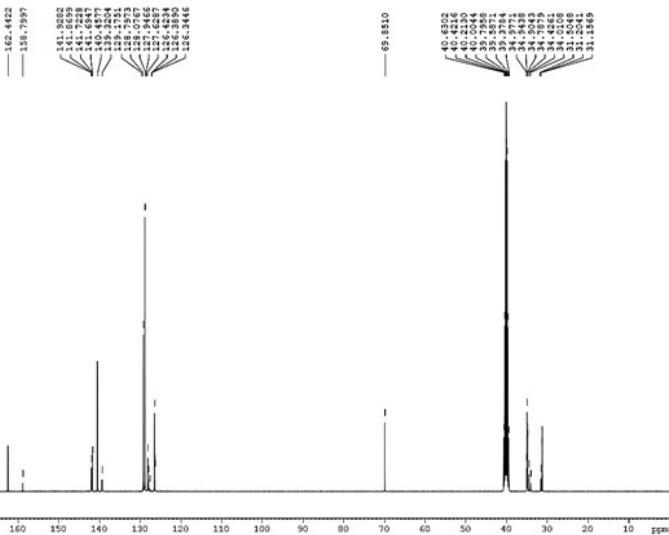

Supplement: d3py00764b7.pdf [file d3py00764b7.pdf]

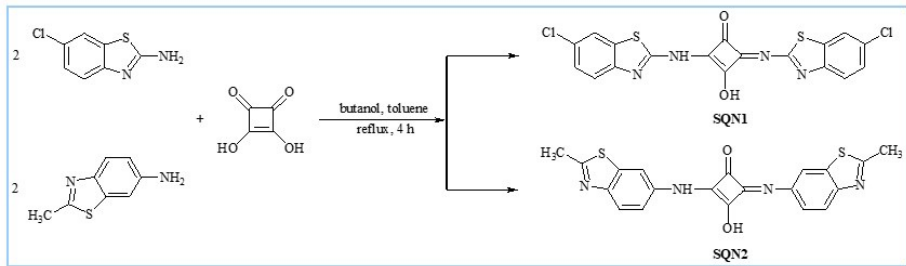

Supplement: d3py00764b8.pdf [file d3py00764b8.pdf]
